# Supplementary material for: Serum prolactin revisited: parametric reference intervals and cross platform evaluation of polyethylene glycol precipitation-based methods for discrimination between hyperprolactinemia and macroprolactinemia
Source: publisher site journal article supplement (doi:10.1515/cclm-2016-0902), 2017-01-01
Supplement: Supplementary file 1 [file cclm-2016-0902_suppl.zip]

**Supplemental Table S1.** Parametric reference intervals (95%) for total –and monomeric prolactin (mIU/L) in serum samples from females and males for each immunoassay platform indicated.

| Method                                | 2.5% lower percentile (mIU/L) | 97.5% upper percentile (mIU/L) | Manufacturer reported RI (mIU/L) | Mean post-PEG recovery (%) |
|---------------------------------------|-------------------------------|--------------------------------|----------------------------------|----------------------------|
| <b>Total prolactin</b>                |                               |                                |                                  |                            |
| <i>Females (n=96)</i>                 |                               |                                |                                  |                            |
| Architect                             | 4.0 (3.6–4.5)                 | 19.5 (17.4–21.8)               | 5.2–26.5                         | N/A                        |
| AutoDelfia                            | 2.4 (2.1–2.7)                 | 14.0 (12.4–15.9)               | 3.1–16.4                         | N/A                        |
| Cobas                                 | 4.2 (3.7–4.7)                 | 19.7 (17.6–22.1)               | 4.8–23.4                         | N/A                        |
| Dimension Vista <sup>b</sup>          | 3.3 (2.9–3.7)                 | 17.1 (15.2–19.3)               | 2.2–30.3                         | N/A                        |
| Immulite                              | 3.0 (2.6–3.4)                 | 17.3 (15.2–19.6)               | 1.9–25.0                         | N/A                        |
| Kryptor                               | 3.4 (3.0–3.7)                 | 14.0 (12.6–15.5)               | 3.8–20.7 <sup>a</sup>            | N/A                        |
| <i>Males (n=127)</i>                  |                               |                                |                                  |                            |
| Architect                             | 3.4 (3.0–3.7)                 | 16.5 (15.0–18.2)               | 3.5–19.4                         | N/A                        |
| AutoDelfia                            | 2.0 (1.8–2.2)                 | 11.1 (9.9–12.3)                | 2.0–13.2                         | N/A                        |
| Cobas                                 | 3.4 (3.1–3.8)                 | 17.5 (15.8–19.4)               | 4.1–15.3                         | N/A                        |
| Dimension Vista                       | 2.7 (2.4–3.0)                 | 14.7 (13.2–16.3)               | 2.5–17.4                         | N/A                        |
| Immulite                              | 2.6 (2.4–2.9)                 | 15.0 (13.4–16.7)               | 2.5–17.0                         | N/A                        |
| Kryptor                               | 2.8 (2.6–3.1)                 | 13.9 (12.6–15.3)               | 2.8–12.1 <sup>a</sup>            | N/A                        |
| <b>Post-PEG (monomeric) prolactin</b> |                               |                                |                                  |                            |
| <i>Females (n=96)</i>                 |                               |                                |                                  |                            |
| Architect                             | 2.8 (2.5–3.0)                 | 10.7 (9.7–11.8)                | ND                               | 63 (21–81)                 |
| AutoDelfia                            | 1.7 (1.5–1.9)                 | 7.1 (6.4–7.8)                  | ND                               | 61 (15–87)                 |
| Cobas                                 | 2.7 (2.3–3.3)                 | 12.1 (10.5–14.0)               | ND                               | 64 (38–84)                 |
| Dimension Vista <sup>b</sup>          | 2.3 (2.0–2.5)                 | 9.9 (8.9–11.0)                 | ND                               | 64 (26–80)                 |
| Immulite                              | 3.3 (3.0–3.7)                 | 12.4 (11.3–13.6)               | ND                               | 91 (34–135)                |
| Kryptor                               | 4.3 (3.9–4.7)                 | 15.8 (14.3–17.3)               | ND                               | 122 (65–261)               |
| <i>Males (n=127)</i>                  |                               |                                |                                  |                            |
| Architect                             | 2.4 (2.1–2.6)                 | 9.9 (9.0–10.9)                 | ND                               | 65 (25–81)                 |
| AutoDelfia                            | 1.4 (1.3–1.6)                 | 6.5 (5.9–7.1)                  | ND                               | 65 (23–91)                 |
| Cobas                                 | 2.4 (2.2–2.6)                 | 10.9 (10.0–12.0)               | ND                               | 66 (25–80)                 |
| Dimension Vista                       | 1.9 (1.7–2.1)                 | 9.2 (8.3–10.1)                 | ND                               | 67 (25–91)                 |
| Immulite                              | 2.9 (2.6–3.4)                 | 11.2 (10.3–12.2)               | ND                               | 88 (34–172)                |
| Kryptor                               | 3.8 (3.5–4.1)                 | 14.4 (13.3–15.7)               | ND                               | 120 (45–218)               |

<sup>a</sup>5–95 percentile

<sup>b</sup>Female reference intervals using healthy donors (n=95) subjected to exclusion criteria as described in Materials and Methods (i.e. regular menstrual cycle, no hormonal therapy and no night shift)

ND. Not determined

Numbers in parenthesis are 90% confidence intervals

Post-PEG recovery percentage is given as mean value and range in parenthesis
