# Supplementary material for: Serum prolactin revisited: parametric reference intervals and cross platform evaluation of polyethylene glycol precipitation-based methods for discrimination between hyperprolactinemia and macroprolactinemia
Source: publisher site journal article supplement (doi:10.1515/cclm-2016-0902), 2017-01-01
Supplement: Supplementary file 2 [file cclm-2016-0902_suppl.zip]

**Supplemental Table S2. Classification of validation sera**

| ID  | Gender | AutoDelfia prolactin (mIU/L) |          | Recovery% | Monomer | RI    | Classification | 85% monomer   |                |       |
|-----|--------|------------------------------|----------|-----------|---------|-------|----------------|---------------|----------------|-------|
|     |        | GFC                          | Post-PEG |           |         |       |                | Beltran et al | Classification |       |
|     |        | monomer %                    | Total    | monomeric |         |       |                |               |                |       |
| S1  | Female | 92                           | 2592     | 2016      | 78      | 2385  | 505            | Hyper         | 429            | Hyper |
| S2  | Female | 74                           | 1080     | 720       | 67      | 799   | 505            | Hyper         | 429            | Hyper |
| S3  | Male   | 95                           | 1440     | 1080      | 75      | 1368  | 398            | Hyper         | 338            | Hyper |
| S4  | Male   | 83                           | 3240     | 2376      | 73      | 2689  | 398            | Hyper         | 338            | Hyper |
| S5  | Female | 86                           | 5040     | 3528      | 70      | 4334  | 505            | Hyper         | 429            | Hyper |
| S6  | Female | 90                           | 6984     | 5472      | 78      | 6286  | 505            | Hyper         | 429            | Hyper |
| S7  | Female | 88                           | 109872   | 89640     | 82      | 96687 | 505            | Hyper         | 429            | Hyper |
| S8  | Female | 87                           | 112248   | 90072     | 80      | 97656 | 505            | Hyper         | 429            | Hyper |
| S9  | Female | 89                           | 37512    | 32904     | 88      | 33386 | 505            | Hyper         | 429            | Hyper |
| S10 | Female | 90                           | 24192    | 20304     | 84      | 21773 | 505            | Hyper         | 429            | Hyper |
| S11 | Female | 90                           | 64008    | 59616     | 93      | 57607 | 505            | Hyper         | 429            | Hyper |
| S12 | Female | 36                           | 2088     | 936       | 45      | 752   | 505            | Hyper         | 429            | Hyper |
| S13 | Male   | 58                           | 3456     | 1440      | 42      | 2004  | 398            | Hyper         | 338            | Hyper |
| S14 | Female | 41                           | 1944     | 576       | 30      | 797   | 505            | Hyper         | 429            | Hyper |
| S15 | Female | 31                           | 2232     | 288       | 13      | 692   | 505            | Hyper         | 429            | Hyper |
| S16 | Female | 27                           | 1368     | 144       | 11      | 369   | 505            | Macro         | 429            | Macro |
| S17 | Female | 20                           | 1368     | 288       | 21      | 274   | 505            | Macro         | 429            | Macro |
| S18 | Female | 12                           | 1584     | 144       | 9       | 190   | 505            | Macro         | 429            | Macro |
| S19 | Female | 9                            | 1152     | 144       | 13      | 104   | 505            | Macro         | 429            | Macro |
| S20 | Female | 9                            | 2304     | 144       | 6       | 207   | 505            | Macro         | 429            | Macro |
| S21 | Female | 19                           | 1872     | 288       | 15      | 356   | 505            | Macro         | 429            | Macro |
| S22 | Female | 10                           | 2088     | 144       | 7       | 209   | 505            | Macro         | 429            | Macro |
| S23 | Female | 8                            | 2232     | 144       | 6       | 179   | 505            | Macro         | 429            | Macro |
| S24 | Female | 7                            | 3240     | 216       | 7       | 227   | 505            | Macro         | 429            | Macro |
| S25 | Female | 16                           | 1512     | 216       | 14      | 242   | 505            | Macro         | 429            | Macro |
| S26 | Female | 7                            | 4320     | 144       | 3       | 302   | 505            | Macro         | 429            | Macro |
| S27 | Male   | 35                           | 648      | 216       | 33      | 227   | 398            | Macro         | 338            | Macro |

Serum samples are classified as hyperprolactinemic (H) when immunoassay concentrations corrected for prolactin monomer as determined by GFC/AutoDelfia analysis are higher than the platform specific reference interval. Macroprolactinemic (M) samples are classified as such if PEG recovery is <50% as determined by the AutoDelfia method and prolactin concentration is contained in the reference interval after correction for prolactin monomer content as determined by GFC/AutoDelfia analysis
